# Supplementary material
Source: ML conference proceedings conference paper supplement (https://openreview.net/forum?id=BElGwDLoqlc)

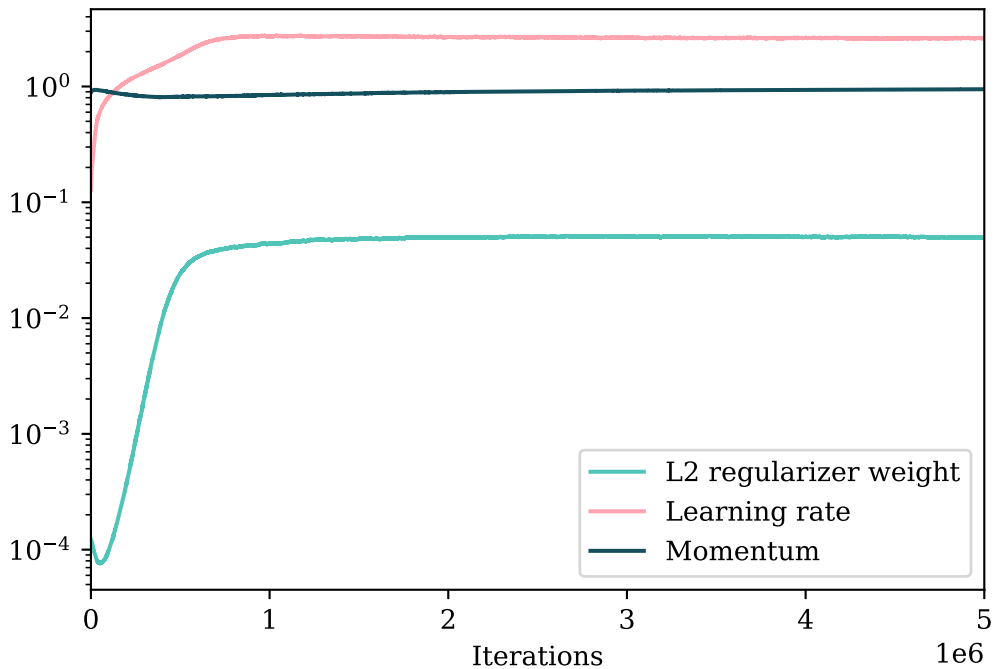

Supplement: supplementary_material [file attachment]

**Input:** a set of 16 images

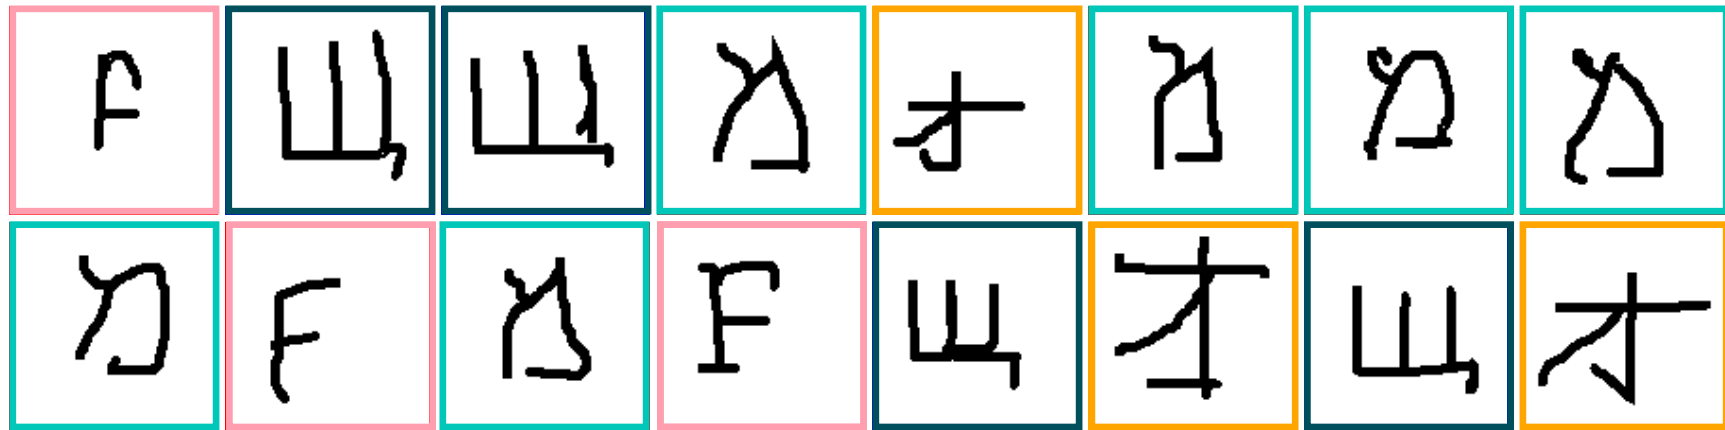

**Answer:** number of unique characters (4 / 10)

Supplement: supplementary_material [file attachment]

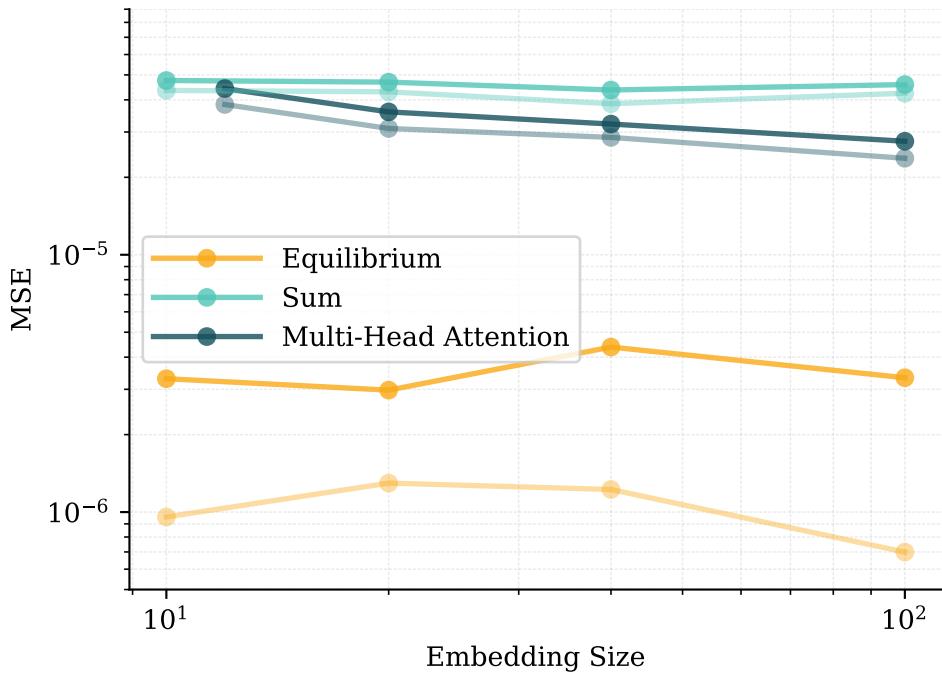

Supplement: supplementary_material [file attachment]

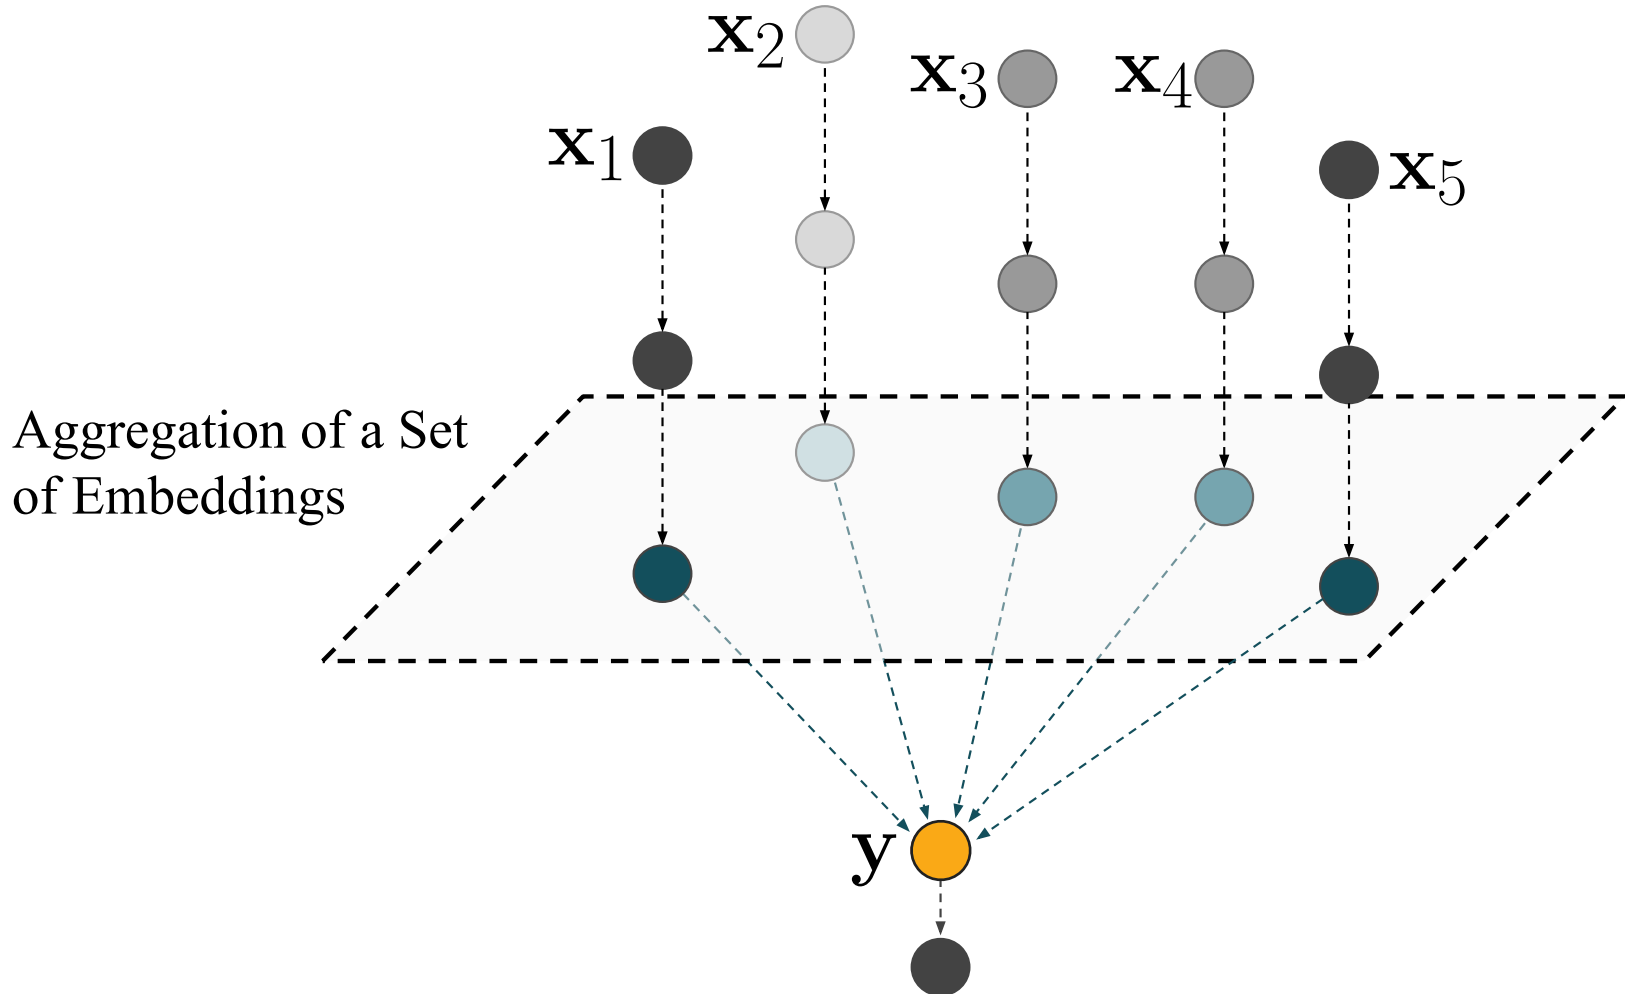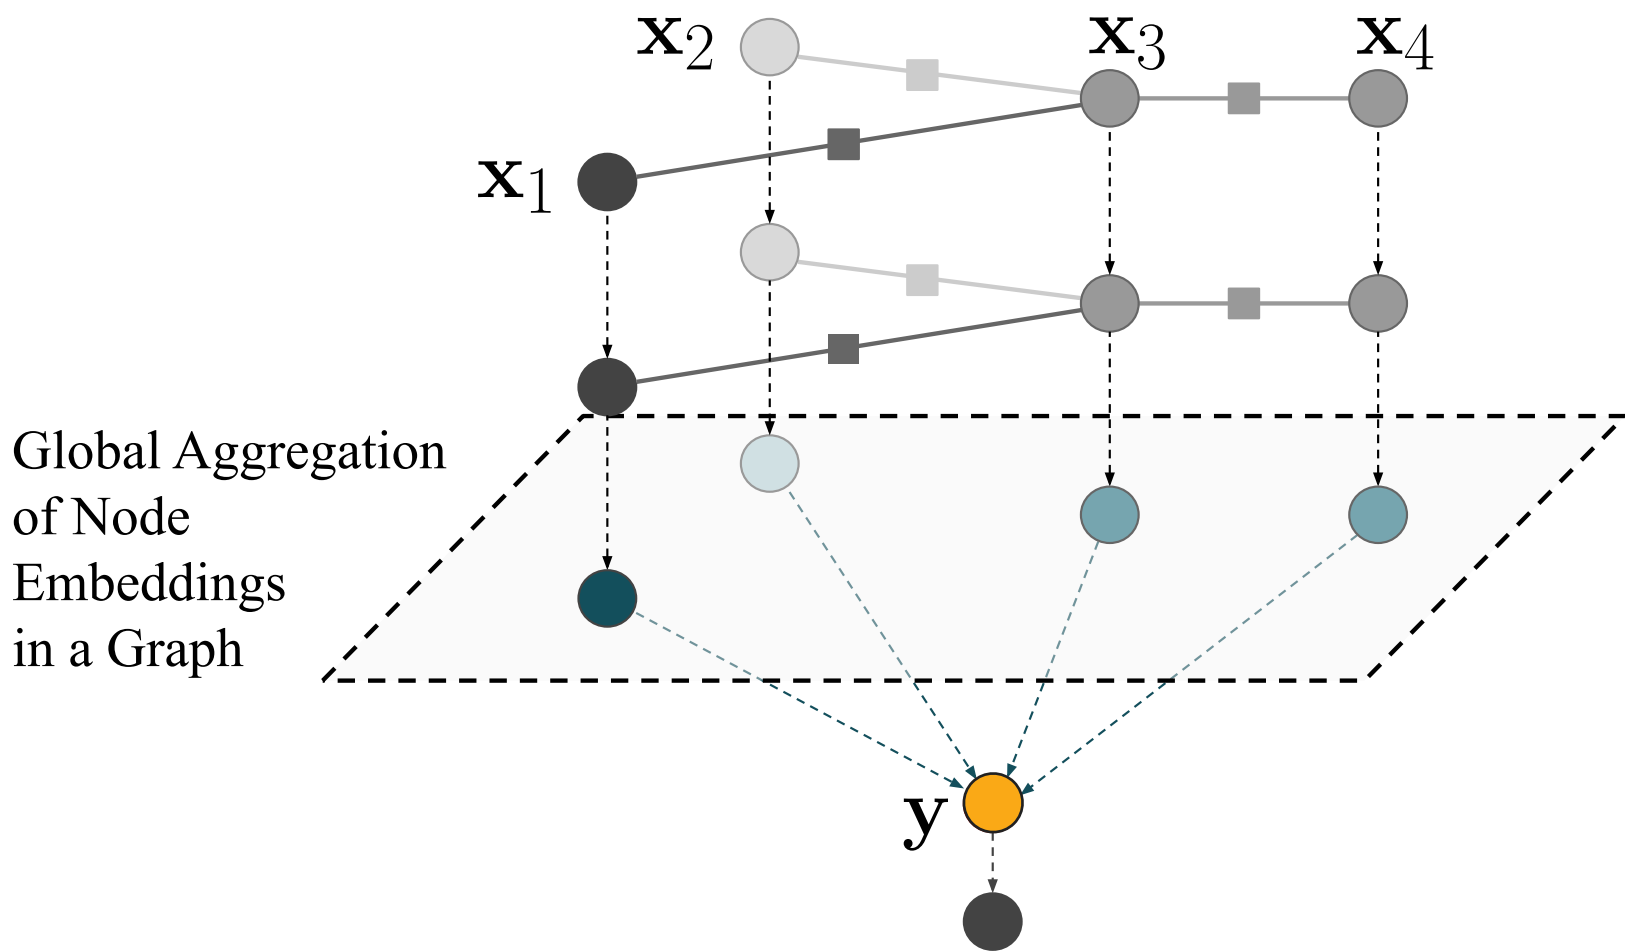

Supplement: supplementary_material [file attachment]

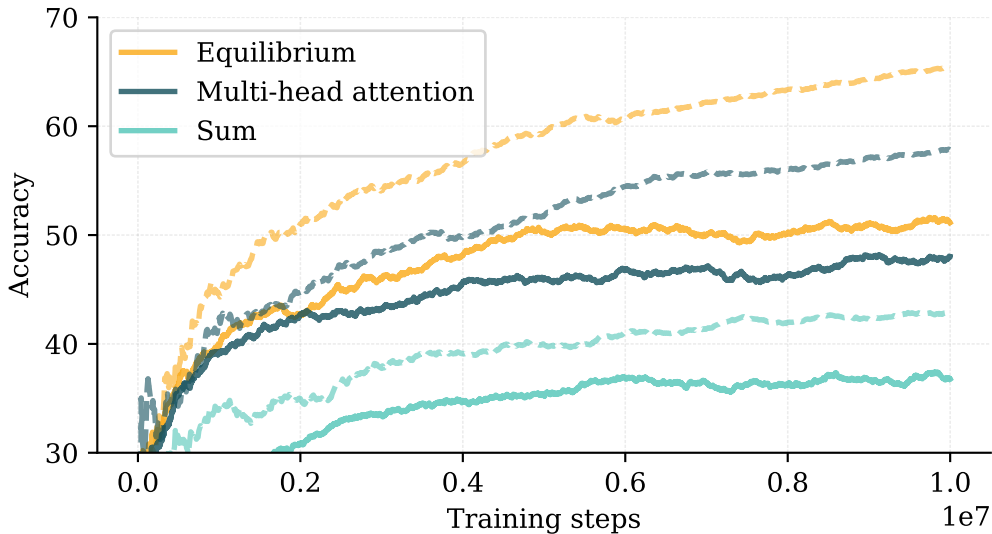

Supplement: supplementary_material [file attachment]

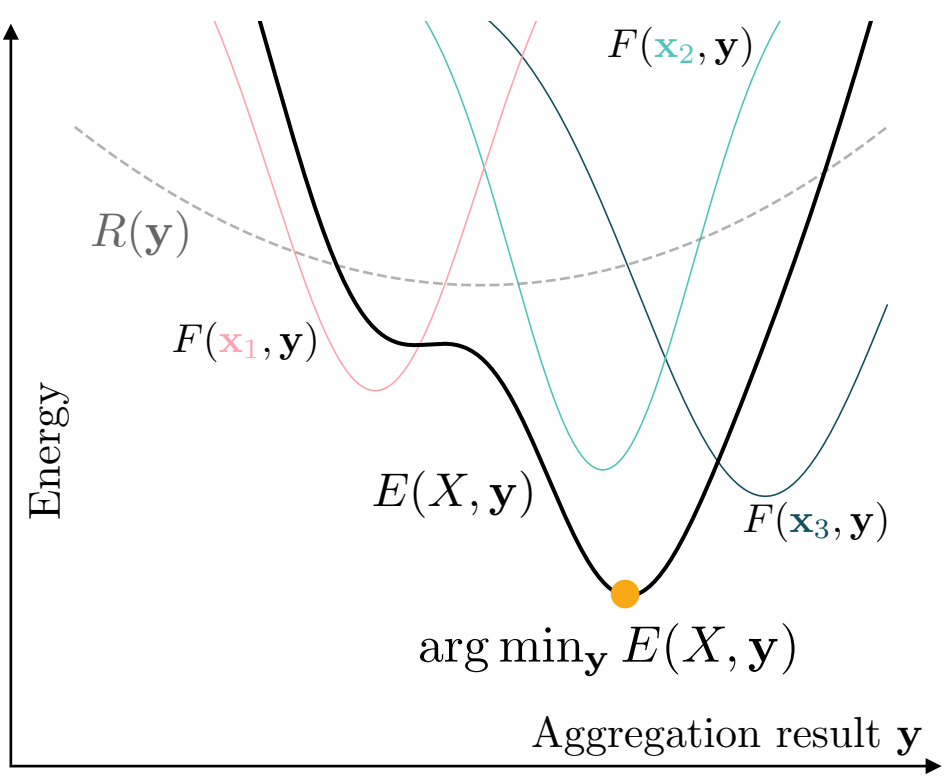

Supplement: supplementary_material [file attachment]

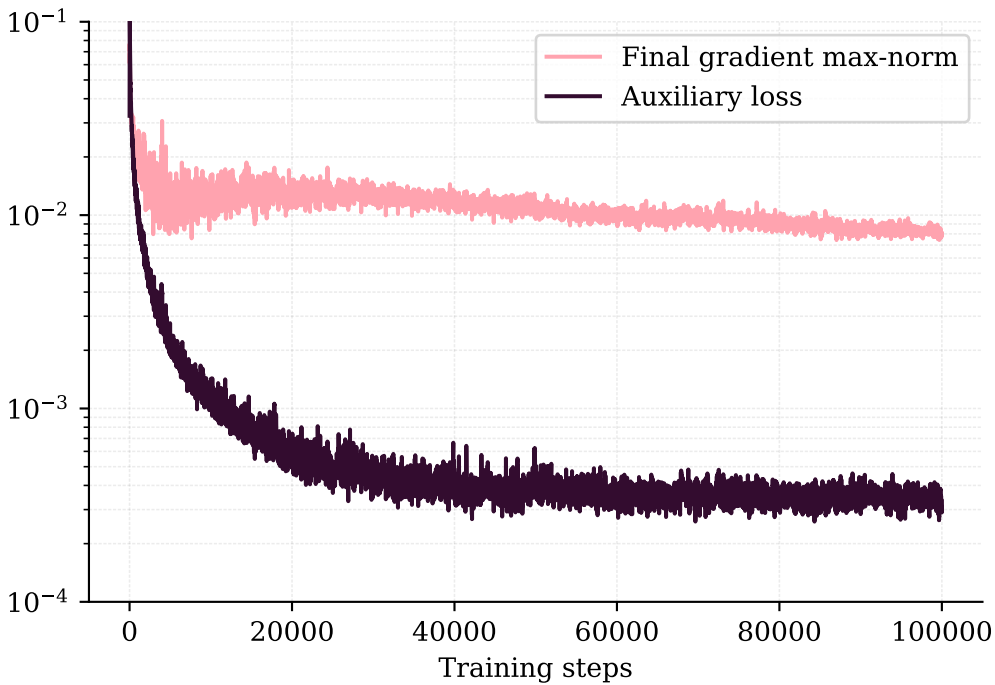

Supplement: supplementary_material [file attachment]
